# Supplementary material for: Hybrid Enhancement of Surface-Enhanced Raman Scattering Using Few-Layer MoS2 Decorated with Au Nanoparticles on Si Nanosquare Holes
Source: MDPI journal article supplement (doi:10.3390/nano12050786), 2022-02-25
Supplement: s1 [file s1]

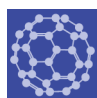

Supplementary Materials

# Hybrid Enhancement of Surface-Enhanced Raman Scattering Using Few-Layer MoS<sub>2</sub> Decorated with Au Nanoparticles on Si Nanosquare Holes

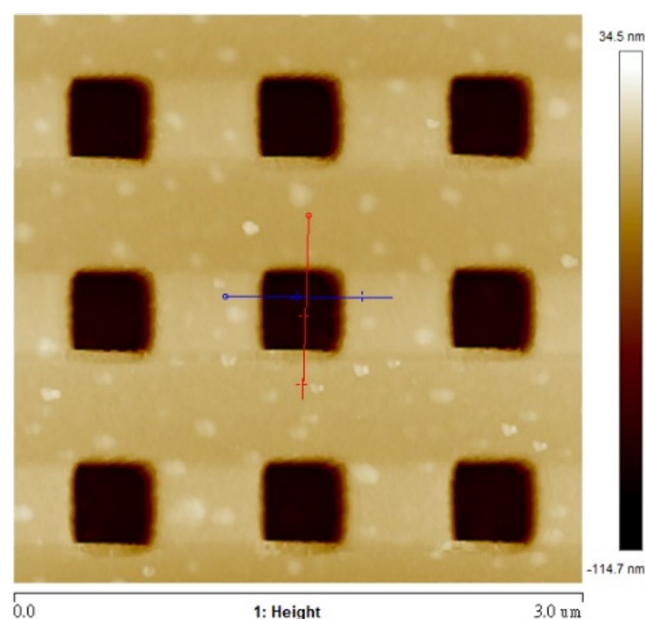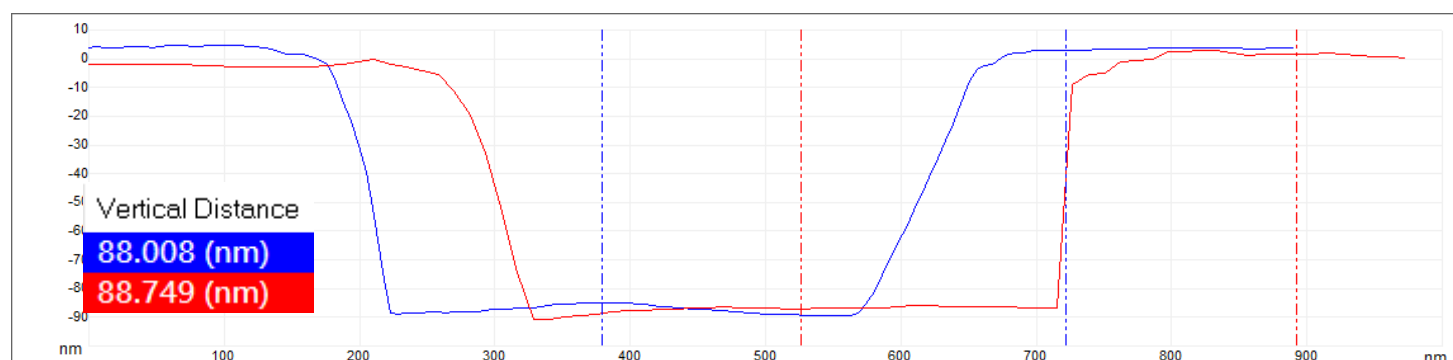

**Figure S1.** AFM image and cross-sectional profiles along blue and red lines of few-layer MoS<sub>2</sub> /Si NSHs.

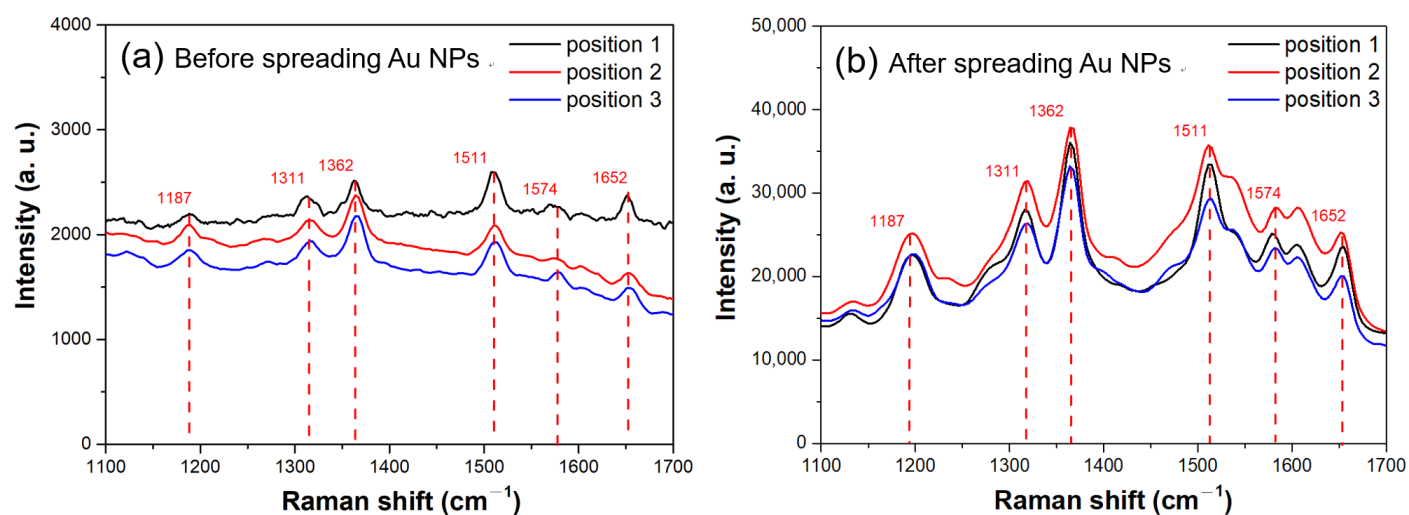

**Figure S2.** (a) Before and (b) after spreading Au NPs, SERS signals of R6G molecules ( $10^{-6}$  M) from randomly different positions 1–3 on few-layer MoS<sub>2</sub>/ Si NSHs.
